# Supplementary material
Source: Elsevier journal article supplement (https://www.sciencedirect.com/science/article/pii/S0300893223002798)
Supplement: mmc1 [file mmc1.pdf]

## MATERIAL ADICIONAL

### Tabla 1 del material adicional

Criterios para excluir datos que indiquen cardiopatía izquierda o enfermedad pulmonar relevante

|                                                                                                                                                                                                                                                             |
|-------------------------------------------------------------------------------------------------------------------------------------------------------------------------------------------------------------------------------------------------------------|
| <i>Cardiopatía izquierda</i>                                                                                                                                                                                                                                |
| Síntomas y signos de congestión pulmonar<br>Fracción de eyección del ventrículo izquierdo < 50%<br>Valvulopatía mitral o aórtica moderada-grave conocida<br>Miocardiopatía conocida                                                                         |
| <i>Enfermedad pulmonar relevante</i>                                                                                                                                                                                                                        |
| Pruebas de función respiratoria: <ul style="list-style-type: none"><li>• FEV<sub>1</sub> ≥ 60%</li><li>• FEV<sub>1</sub>/capacidad vital forzada ≥ 0,6</li><li>• Capacidad pulmonar total ≥ 70%</li><li>• TC pulmonar con afección parenquimatosa</li></ul> |

FEV<sub>1</sub>: volumen espiratorio forzado en el primer minuto; TC: tomografía computarizada.

## Tabla 2 del material adicional

Variables ecocardiográficas derivadas del estudio de disfunción diastólica en la cohorte de pacientes estratificada según la respuesta hemodinámica en esfuerzo

|                                       | Todos<br>(n = 29) | Respuesta hemodinámica |                    | p     |
|---------------------------------------|-------------------|------------------------|--------------------|-------|
|                                       |                   | Patológica<br>(n = 13) | Normal<br>(n = 16) |       |
| Diámetro A-P de la AI (mm)            | 31,6 ± 5,4        | 32,1 ± 5,4             | 31,3 ± 5,6         | 0,987 |
| Volumen de la AI (ml/m <sup>2</sup> ) | 30,7 ± 7,8        | 32,6 ± 8,0             | 29,4 ± 7,6         | 0,461 |
| E/A                                   | 1,2 ± 0,3         | 1,2 ± 0,4              | 1,3 ± 0,4          | 0,471 |
| E/e' lateral                          | 6,0 ± 1,8         | 5,6 ± 1,6              | 6,3 ± 2,0          | 0,431 |
| Insuficiencia mitral I-II/IV          | 1 (3,5)           | 1 (7,7)                | 0                  | 0,448 |

AI: aurícula izquierda; A-P: anteroposterior.

Los valores expresan n (%) o media ± desviación estándar.

### Tabla 3 del material adicional

Respuesta tensional, frecuencia cardiaca y saturación de oxígeno periférica medidas durante la prueba de esfuerzo cardiopulmonar en toda la cohorte y según la respuesta hemodinámica

|                              | Todos (n = 29) | Respuesta hemodinámica patológica (n = 13) | Respuesta hemodinámica normal (n = 16) | p     |
|------------------------------|----------------|--------------------------------------------|----------------------------------------|-------|
| PAS basal (mmHg)             | 112,6 ± 14,1   | 114,6 ± 13,1                               | 110,9 ± 15,0                           | 0,407 |
| PAD basal (mmHg)             | 79,8 ± 25,1    | 86,5 ± 35,7                                | 74,4 ± 9,1                             | 0,211 |
| PAS pico (mmHg)              | 166,3 ± 23,6   | 168,5 ± 28,6                               | 164,6 ± 19,5                           | 0,522 |
| PAD pico (mmHg)              | 86,0 ± 12,8    | 88,4 ± 15,6                                | 84,1 ± 10,0                            | 0,605 |
| FC basal (lpm)               | 76,3 ± 13,4    | 77,8 ± 12,3                                | 75,1 ± 14,6                            | 0,380 |
| FC pico (lpm)                | 145,9 ± 23,1   | 150,3 ± 23,5                               | 141,9 ± 22,9                           | 0,173 |
| SatO <sub>2</sub> pico < 90% | 4 (13,8)       | 3 (23,1)                                   | 1 (6,3)                                | 0,223 |

FC: frecuencia cardiaca; PAD: presión arterial diastólica; PAS: presión arterial sistólica; SatO<sub>2</sub>: saturación de oxígeno.

Los valores expresan n (%) o media desviación estándar.
